# Supplementary material for: Silk Fibroin Nanoparticles as a Drug Delivery System of 3,3′-Diindolylmethane with Potential Antiobesogenic Activity
Source: PubMed Central journal article supplement — ACS Omega. 2024 Nov 20;9(48):47661–71. doi: 10.1021/acsomega.4c07203 (PMC11618424; doi:10.1021/acsomega.4c07203), 2024-11-20
Supplement: ao4c07203_si_001.pdf [file ao4c07203_si_001.pdf]

## Supporting information

### Silk fibroin nanoparticles as drug delivery system of 3,3'-diindolylmethane with potential anti-obesogenic activity

Calef Sánchez-Trasviña<sup>a,b</sup>, Helen Y. Lorenzo-Anota<sup>a,c</sup>, Aleyda M. Escobar-Fernández<sup>a,b</sup>, David Lezama-Aguilar<sup>a,b</sup>, Adriana Morales-Martínez<sup>a,c</sup>, Ana Vélez-Barceló<sup>b</sup>, Jorge Benavides<sup>a,b</sup>, Omar Lozano-García<sup>a,c</sup>, Marco Rito-Palomares<sup>a,c</sup>, Karla Mayolo-Deloisa<sup>a,b\*</sup>

<sup>a</sup> Tecnológico de Monterrey, Institute for Obesity Research, Av. Eugenio Garza Sada 2501 Sur, Monterrey NL 64849, México.

<sup>b</sup> Tecnológico de Monterrey, Escuela de Ingeniería y Ciencias, Centro de Biotecnología-FEMSA, Av. Eugenio Garza Sada 2501 Sur, Monterrey, NL 64849, Mexico.

<sup>c</sup> Tecnológico de Monterrey, Escuela de Medicina y Ciencias de la Salud, Av. Morones Prieto 3000 Pte, Monterrey, NL, Mexico.

Correspondence: [kmayolo@tec.mx](mailto:kmayolo@tec.mx)

#### Content

Supplementary Figure S1.

Supplementary Figure S2.

Supplementary Figure S3.

Supplementary Figure S4.

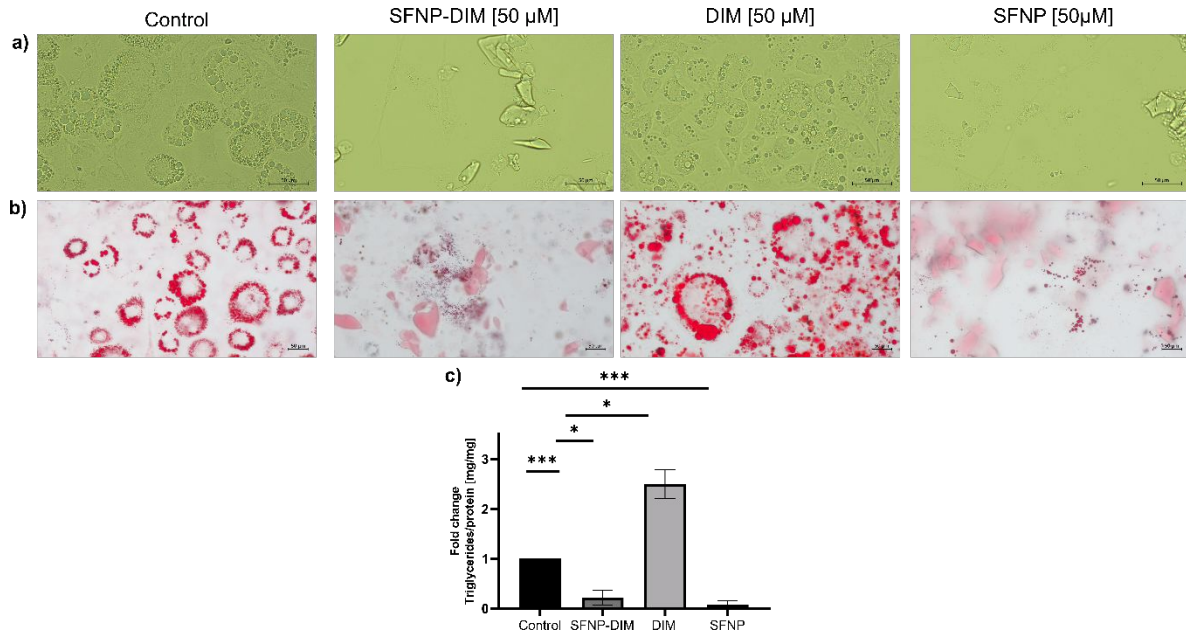

**Figure S1.** Morphology of a) white-like adipocytes at 10 days of differentiation, b) oil red staining of white-like adipocytes at 10 days of differentiation, and c) triglycerides quantification of white-like adipocytes at 10 days of differentiation treated with 5  $\mu$ M of DIM, SFNP, and SFNP-DIM. The equivalent concentration of SFNP-DIM was determined based on DIM drug loading. Scale bar 50  $\mu$ m. Data are presented as a mean  $\pm$  SEM of triplicates of at least three independent experiments. \*  $p < 0.05$ , \*\*\*  $p < 0.001$ .

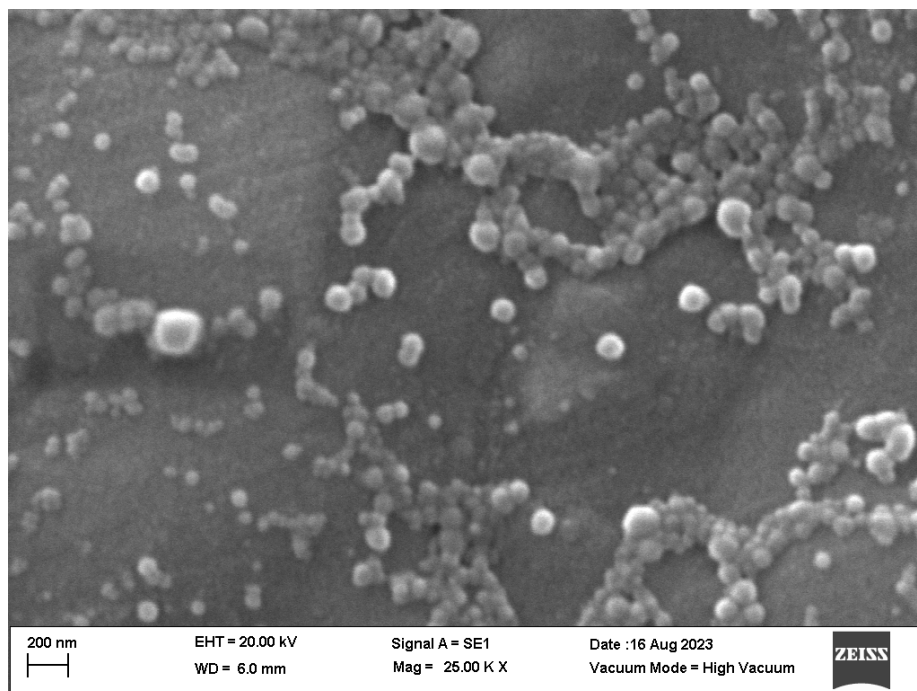

**Figure S2.** Raw micrographs of silk fibroin nanoparticles using acetone as solvent. Nanoparticles prepared by the reverse microemulsion method using 5 % w/v of silk fibroin solution.

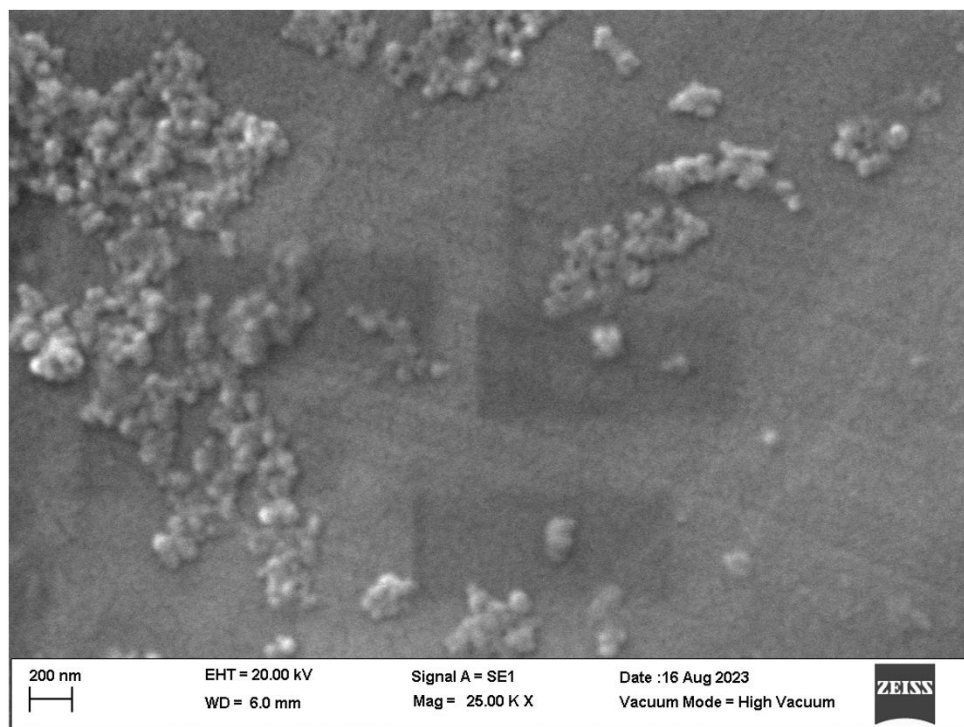

**Figure S3.** Raw micrographs of silk fibroin nanoparticles using ethanol as solvent. Nanoparticles prepared by the reverse microemulsion method using 5 % w/v of silk fibroin solution.

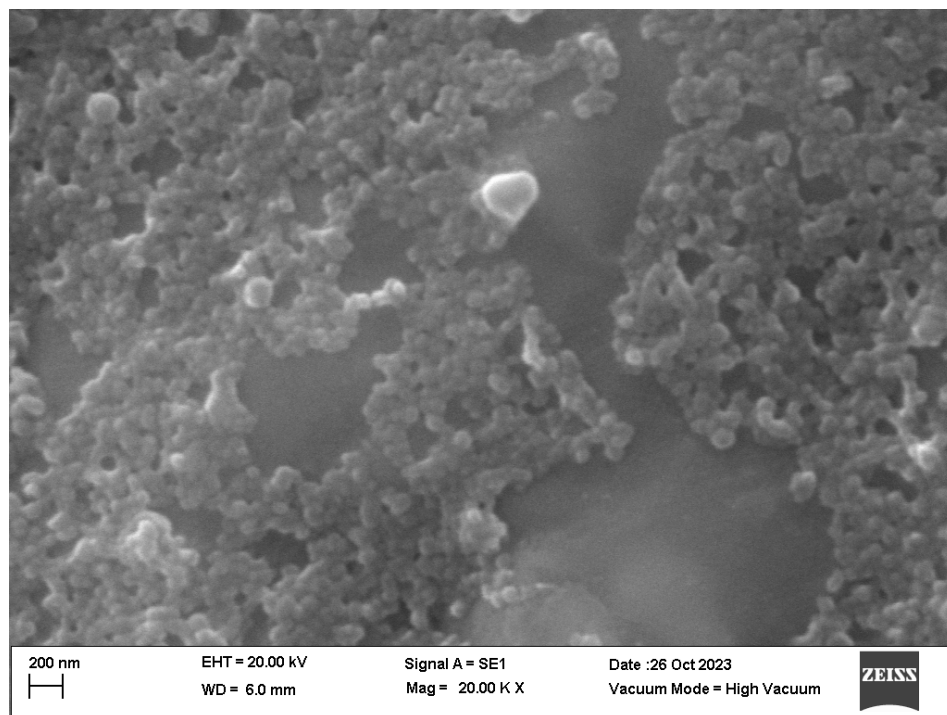

**Figure S4.** Raw micrographs of silk fibroin nanoparticles loaded with DIM. Nanoparticles prepared by the reverse microemulsion method using 5 % w/v of silk fibroin solution at DIM:fibroin mass ratio 1:1.
